# Supplementary material for: Early changes in immune cell subsets with corticosteroids in patients with solid tumors: implications for COVID-19 management
Source: HighWire-hosted journal article supplement (doi:10.1136/jitc-2020-001019), 2020-11-01
Supplement: jitc-2020-001019supp001_data_supplement.pdf [file jitc-2020-001019supp001_data_supplement.pdf]

**Supplementary Table 1:** Studies reviewed for patients meeting the analysis criteria.

| <b>NCT #</b> | <b>n=425</b> |
|--------------|--------------|
| NCT01417546  | 69           |
| NCT01772004  | 131          |
| NCT02155647  | 6            |
| NCT02517398  | 54           |
| NCT02933255  | 16           |
| NCT02840994  | 17           |
| NCT02994953  | 27           |
| NCT03384316  | 11           |
| NCT03427411  | 56           |
| NCT03493945  | 38           |

\*Co-enrolled non-treatment protocols:

Biospecimen Acquisition (NCT00034216), Long Term Follow Up (NCT00451022)
